# Supplementary material
Source: PubMed Central journal article supplement (PMC5502032)

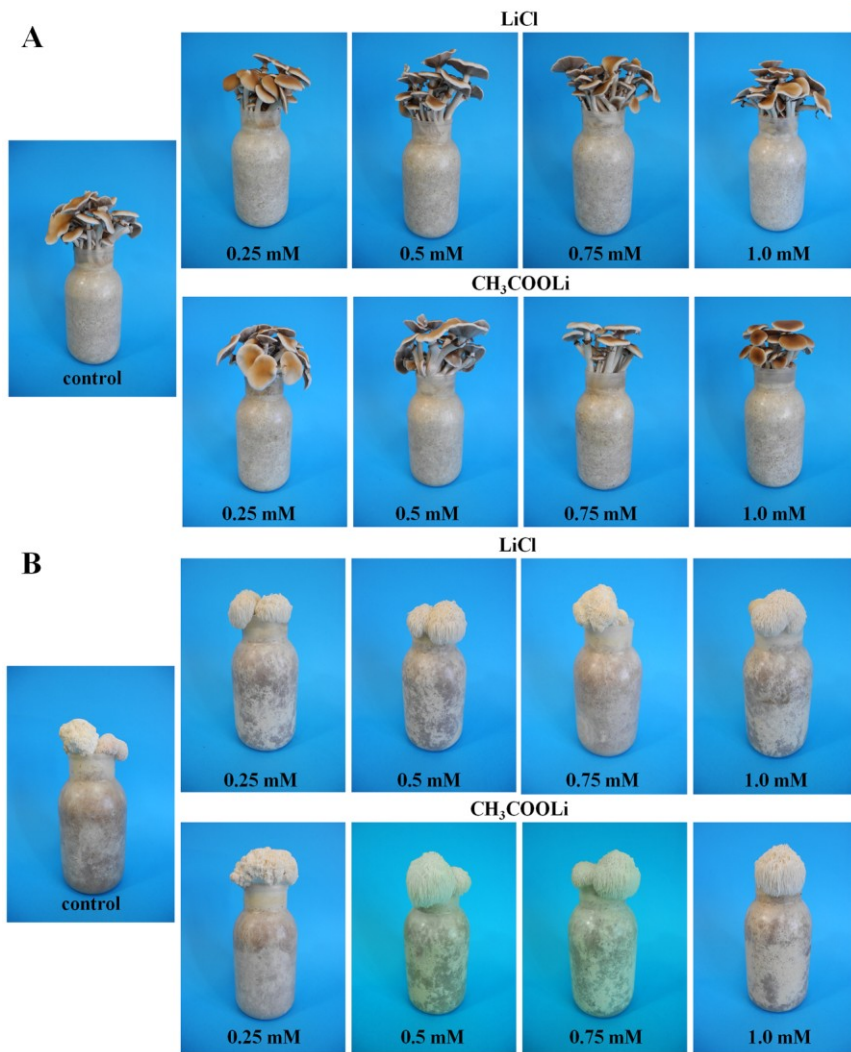

**Figure S1.** Morphometric changes of mushroom species regards lithium addition

Supplement: 13197_2017_2679_MOESM1_ESM.pdf [file 13197_2017_2679_MOESM1_ESM.pdf]
